# Supplementary material
Source: Springer Nature journal article supplement (https://www.springermedizin.de/resource/supplementary/12881_2012_988_MOESM1_ESM.pdf/9451766)

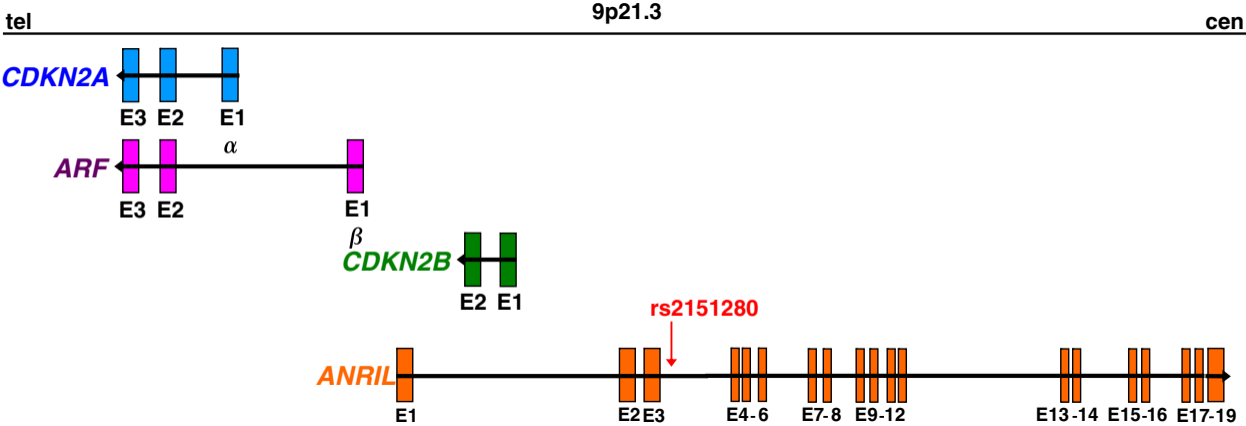

Supplement: MOESM1 [file 9451766]
